# Supplementary material for: How to predict seasonal weather and monsoons with radionuclide monitoring
Source: PubMed Central journal article supplement (PMC6390104; doi:10.1038/s41598-019-39664-7), 2019-02-25
Supplement: 41598_2019_39664_MOESM1_ESM.pdf [file 41598_2019_39664_MOESM1_ESM.pdf]

1 **Extended Data**

2  
3 **Title: How to predict seasonal weather and monsoons with radionuclide monitoring**

4  
5 **Authors:** Lucrezia Terzi <sup>a,b,\*</sup>, Martin Kalinowski <sup>c</sup>, Michael Schoeppner <sup>c,d</sup>, Gerhard Wotawa <sup>e</sup>

6 **Affiliations:** <sup>a</sup> Belgian Nuclear Research Centre (SCK•CEN), Mol, Belgium and <sup>b</sup> Technische Universität Wien, Atominstitut, Austria; <sup>c</sup> Provisional Technical  
7 Secretariat, Preparatory Commission for the Nuclear-Test-Ban Treaty Organization, Vienna, Austria; <sup>d</sup> Institute of Safety/Security and Risk Sciences, Vienna,  
8 Austria; <sup>e</sup> Zentralanstalt für Meteorologie und Geodynamik (ZAMG), Vienna, Austria.

9  
10 **\*Corresponding Author:**

11 Lucrezia Terzi

12 Ph: +43 6644553833

13 e-mail: lucrezia.terzi@sckcen.be

14 <sup>a</sup> SCK•CEN, Belgium Nuclear Research Centre,

15 Boeretang 200, 2400 Mol, Belgium.

16 <sup>b</sup> Technische Universität Wien, Atominstitut,

17 Stadionallee 2, 1020 Wien, Austria.

18  
19  
20  
21  
22  
23  
24

**Supplementary Tables**

**Table S1.** For each year the cross-point day # and predicted monsoon onset day # is given based on 7Be trans-equatorial approach. Three methods with different warning times: Warning time based on all available years (2009-2017), Warning time based on 2009-2013 and applied to 2014-2018, Warning time based on all previous years average, which is the prediction time that develops with each year. For each predicted monsoon onset provided the corresponding difference from IMD monsoon onset is given. Kerala is the reference region for monsoon onset. Accuracy (trueness and precision) is defined by ISO 5725-1.

| Transequatorial approach - Onset                                                                                     |                                    |                     |                                                                       |                                                              |                                                                       |                                                             |                                                                |                                                                                                    |                                              |                                                                     |                                                                                                                 |
|----------------------------------------------------------------------------------------------------------------------|------------------------------------|---------------------|-----------------------------------------------------------------------|--------------------------------------------------------------|-----------------------------------------------------------------------|-------------------------------------------------------------|----------------------------------------------------------------|----------------------------------------------------------------------------------------------------|----------------------------------------------|---------------------------------------------------------------------|-----------------------------------------------------------------------------------------------------------------|
|                                                                                                                      |                                    |                     | Warning time based on all available years                             |                                                              |                                                                       | Warning time based on 2009-2013 and applied to 2014-2018    |                                                                |                                                                                                    | Warning time based on all previous years     |                                                                     |                                                                                                                 |
| Year                                                                                                                 | IMD monsoon over Kerala onset date | cross point 1 (CP1) | 52 days average warning time based on all available years (2009-2017) | Predicted monsoon onset (CP1 + 52 days average warning time) | Difference between IMD monsoon onset and predicted onset (n. of days) | 53.2 days average warning time based on 5 years (2009-2013) | Predicted monsoon onset (CP1 + 53.2 days average warning time) | Difference between IMD monsoon onset and predicted onset (n. of days) based on 53.2 days lead time | Average warning time based on previous years | Predicted monsoon onset (CP1 + previous years average warning time) | Difference between IMD monsoon onset and predicted onset (n. of days) based on previous years average lead time |
| 2009                                                                                                                 | 143                                | 91                  | 52                                                                    | 143                                                          | 0                                                                     | 52                                                          |                                                                |                                                                                                    |                                              |                                                                     |                                                                                                                 |
| 2010                                                                                                                 | 151                                | 93                  | 58                                                                    | 145                                                          | -6                                                                    | 58                                                          |                                                                |                                                                                                    | 52                                           | 145                                                                 | -6                                                                                                              |
| 2011                                                                                                                 | 149                                | 94                  | 55                                                                    | 146                                                          | -3                                                                    | 55                                                          |                                                                |                                                                                                    | 55                                           | 149                                                                 | 0                                                                                                               |
| 2012                                                                                                                 | 157                                | 106                 | 51                                                                    | 158                                                          | 1                                                                     | 51                                                          |                                                                |                                                                                                    | 55                                           | 161                                                                 | 4                                                                                                               |
| 2013                                                                                                                 | 152                                | 102                 | 50                                                                    | 154                                                          | 2                                                                     | 50                                                          |                                                                |                                                                                                    | 54                                           | 156                                                                 | 4                                                                                                               |
| 2014                                                                                                                 | 157                                | 110                 | 47                                                                    | 162                                                          | 5                                                                     | 47                                                          | 163.2                                                          | 6.2                                                                                                | 53                                           | 163                                                                 | 6.2                                                                                                             |
| 2015                                                                                                                 | 156                                | 103                 | 53                                                                    | 155                                                          | -1                                                                    | 53                                                          | 156.2                                                          | 0.2                                                                                                | 52                                           | 155                                                                 | -0.83                                                                                                           |
| 2016                                                                                                                 | 160                                | 104                 | 56                                                                    | 156                                                          | -4                                                                    | 56                                                          | 157.2                                                          | -2.8                                                                                               | 52                                           | 156                                                                 | -3.71                                                                                                           |
| 2017                                                                                                                 | 157                                | 110                 | 47                                                                    | 162                                                          | 5                                                                     | 47                                                          | 163.2                                                          | 6.2                                                                                                | 53                                           | 163                                                                 | 5.75                                                                                                            |
| 2018                                                                                                                 | 145                                | 90                  | 55                                                                    | 142                                                          | -3                                                                    | 55                                                          | 143.2                                                          | -1.8                                                                                               | 52                                           | 142                                                                 | -2.89                                                                                                           |
| Correlation between IMD monsoon onset and predicted onset using transequatorial method (CP1 + averaged warning time) |                                    |                     | 0.89                                                                  |                                                              |                                                                       | 0.86                                                        |                                                                |                                                                                                    | 0.84                                         |                                                                     |                                                                                                                 |

|          |                                                                                                                                                |       |      |      |
|----------|------------------------------------------------------------------------------------------------------------------------------------------------|-------|------|------|
| Accuracy | Trueness-<br>Difference between IMD<br>monsoon onset and<br>predicted onset using<br>transequatorial<br>approach                               | -0.39 | 1.60 | 0.72 |
|          | Precision-<br>Standard deviation of<br>the Difference between<br>IMD monsoon onset<br>and predicted onset<br>using transequatorial<br>approach | 3.7   | 4.34 | 4.44 |

25  
26

27  
28  
29  
30  
31  
32

**Table S2.** For each predicted monsoon withdrawal provided using transequatorial approach (CP2 obtained with 0/-15 days normalized average of <sup>7</sup>Be activity concentrations) the corresponding difference from IMD monsoon withdrawal is given. Three methods with different warning times: Warning time based on all available years (2009-2017), Warning time based on 2009-2013 and applied to 2014-2017, Warning time based on all previous years average, which is the prediction time that develops with each year. With warning time based on all previous years, due to the increased weight of 2010 offset, withdrawal present results in a correlation of 0.23 versus 0.90 obtained when 2010 offset is excluded. Accuracy (trueness and precision) is defined by ISO 5725-1. Kerala is the reference region for monsoon withdrawal.

| Transequatorial approach - Withdrawal                                                                                          |                                         |                     |                                                                       |                                                                   |                                                                                         |                                                             |                                                                     |                                                                                                              |                                              |                                                                          |                                                                                                                              |
|--------------------------------------------------------------------------------------------------------------------------------|-----------------------------------------|---------------------|-----------------------------------------------------------------------|-------------------------------------------------------------------|-----------------------------------------------------------------------------------------|-------------------------------------------------------------|---------------------------------------------------------------------|--------------------------------------------------------------------------------------------------------------|----------------------------------------------|--------------------------------------------------------------------------|------------------------------------------------------------------------------------------------------------------------------|
|                                                                                                                                |                                         |                     | Warning time based on all available years                             |                                                                   |                                                                                         | Warning time based on 2009-2013 and applied to 2014-2018    |                                                                     |                                                                                                              | Warning time based on all previous years     |                                                                          |                                                                                                                              |
| Year                                                                                                                           | IMD monsoon over Kerala withdrawal date | cross point 2 (CP2) | 42 days average warning time based on all available years (2009-2017) | Predicted monsoon withdrawal (CP2 + 42 days average warning time) | Difference between IMD monsoon withdrawal and predicted monsoon withdrawal (n. of days) | 40.8 days average warning time based on 5 years (2009-2013) | Predicted monsoon withdrawal (CP2 + 40.8 days average warning time) | Difference between IMD monsoon withdrawal and predicted withdrawal (n. of days) based on 40.8 days lead time | Average warning time based on previous years | Predicted monsoon withdrawal (CP2 + previous years average warning time) | Difference between IMD monsoon withdrawal and predicted withdrawal (n. of days) based on previous years average warning time |
| 2009                                                                                                                           | 268                                     | 240                 | 28                                                                    | 282                                                               | 14                                                                                      | 28                                                          |                                                                     |                                                                                                              |                                              |                                                                          |                                                                                                                              |
| 2010                                                                                                                           | 302                                     | 250                 | 52                                                                    | 292                                                               | -10                                                                                     | 52                                                          |                                                                     |                                                                                                              | 28                                           | 278                                                                      | -24                                                                                                                          |
| 2011                                                                                                                           | 297                                     | 256                 | 41                                                                    | 298                                                               | 1                                                                                       | 41                                                          |                                                                     |                                                                                                              | 40                                           | 296                                                                      | -1                                                                                                                           |
| 2012                                                                                                                           | 292                                     | 255                 | 37                                                                    | 297                                                               | 5                                                                                       | 37                                                          |                                                                     |                                                                                                              | 40                                           | 295                                                                      | 3.33                                                                                                                         |
| 2013                                                                                                                           | 294                                     | 248                 | 46                                                                    | 290                                                               | -4                                                                                      | 46                                                          |                                                                     |                                                                                                              | 40                                           | 288                                                                      | -6.5                                                                                                                         |
| 2014                                                                                                                           | 291                                     | 243                 | 48                                                                    | 285                                                               | -6                                                                                      | 48                                                          | 283.8                                                               | -7.2                                                                                                         | 41                                           | 284                                                                      | -7.2                                                                                                                         |
| 2015                                                                                                                           | 301                                     | 253                 | 48                                                                    | 295                                                               | -6                                                                                      | 48                                                          | 293.8                                                               | -7.2                                                                                                         | 42                                           | 295                                                                      | -6.00                                                                                                                        |
| 2016                                                                                                                           | 302                                     | 263                 | 39                                                                    | 305                                                               | 3                                                                                       | 39                                                          | 303.8                                                               | 1.8                                                                                                          | 43                                           | 306                                                                      | 3.86                                                                                                                         |
| 2017                                                                                                                           | 298                                     | 255                 | 43                                                                    | 297                                                               | -1                                                                                      | 43                                                          | 295.8                                                               | -2.2                                                                                                         | 42                                           | 297                                                                      | -0.63                                                                                                                        |
| 2018                                                                                                                           | n/a*                                    | n/a*                | -                                                                     | -                                                                 | -                                                                                       | -                                                           | -                                                                   | -                                                                                                            | -                                            | -                                                                        | -                                                                                                                            |
| Correlation between IMD monsoon withdrawal and predicted withdrawal using transequatorial method (CP2 + averaged warning time) |                                         |                     | 0.73                                                                  |                                                                   |                                                                                         | 0.90                                                        |                                                                     |                                                                                                              | 0.23                                         |                                                                          |                                                                                                                              |

|                                           |                                                                                                                                                                       |       |       |       |
|-------------------------------------------|-----------------------------------------------------------------------------------------------------------------------------------------------------------------------|-------|-------|-------|
| Accuracy                                  | Trueness-<br>Difference between IMD<br>monsoon withdrawal and<br>predicted withdrawal using<br>transequatorial approach                                               | -0.44 | -3.70 | -4.77 |
|                                           | Precision-<br>Standard deviation of the<br>Difference between IMD<br>monsoon withdrawal and<br>predicted withdrawal using<br>transequatorial approach<br>[n. of days] | 7.23  | 4.36  | 8.88  |
| *data not available at time of submission |                                                                                                                                                                       |       |       |       |

33

34



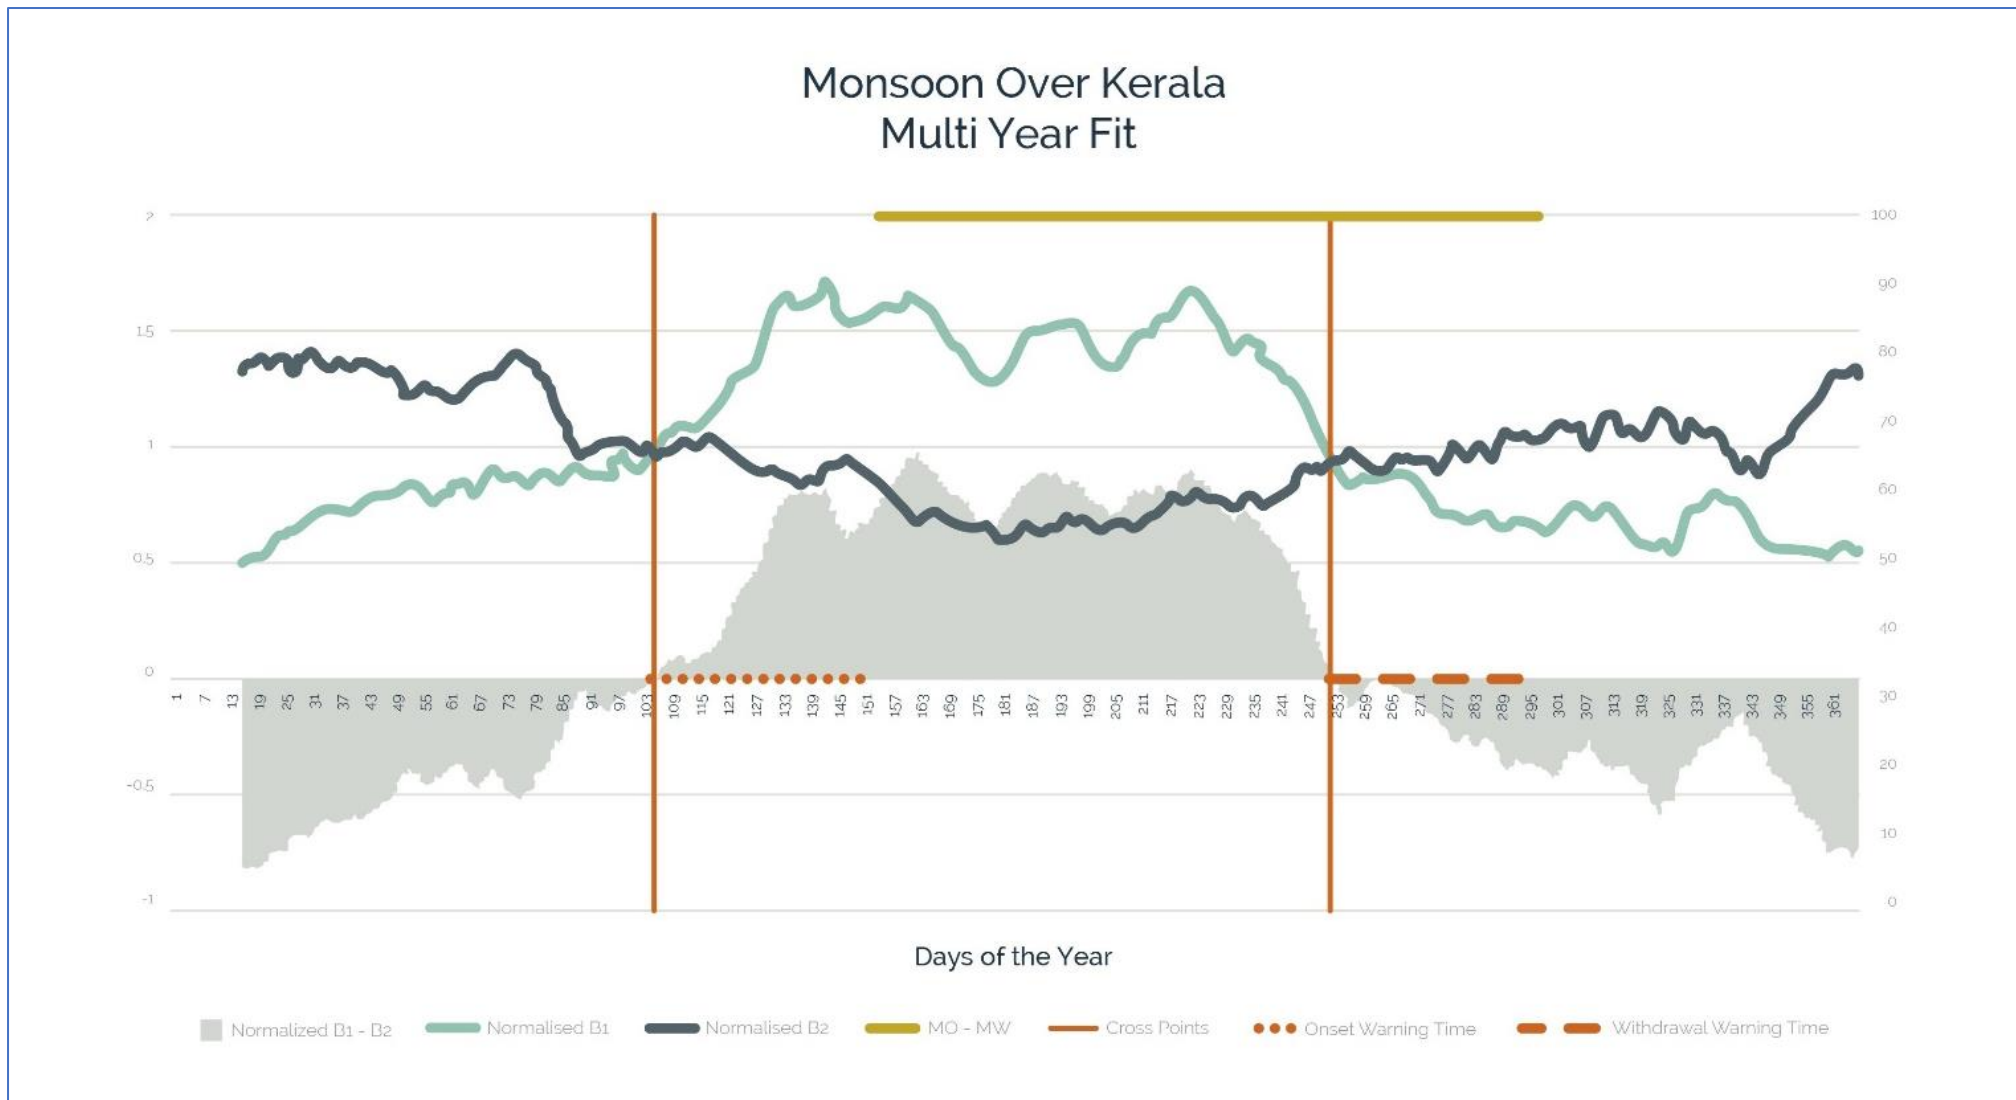

40

41 **Figure S2.** Multiyear-average plot of beryllium-7 activity concentrations from 2009 to 2018. Beryllium-7 ( $^7\text{Be}$ ) [ $\mu\text{Bq}/\text{m}^3$ ] timeseries from Russian (B1 – light green line) and Australian (B2- dark blue line) stations are  
 42 averaged using 0/-15-day average and normalized with the overall average value of each timeseries. Cross points 1 (CP1) and cross point 2 (CP2) are marked with red bars, their provided warning times on onset (52 days)  
 43 and withdrawal (42 days) are marked with red dotted lines. Monsoon period is shown with yellow bar on top of the chart. Onset and withdrawal dates of monsoon over Kerala are retrieved by the Indian Meteorological  
 44 Institute.

45

46

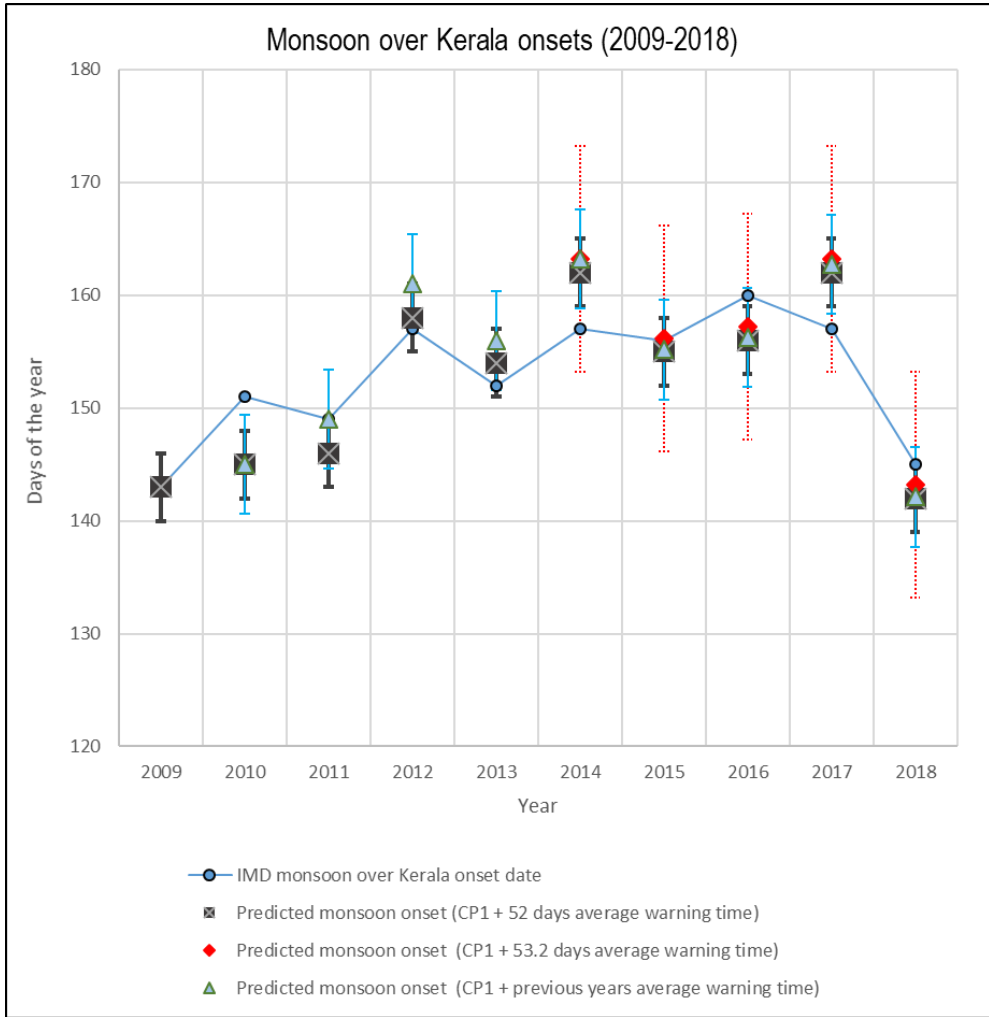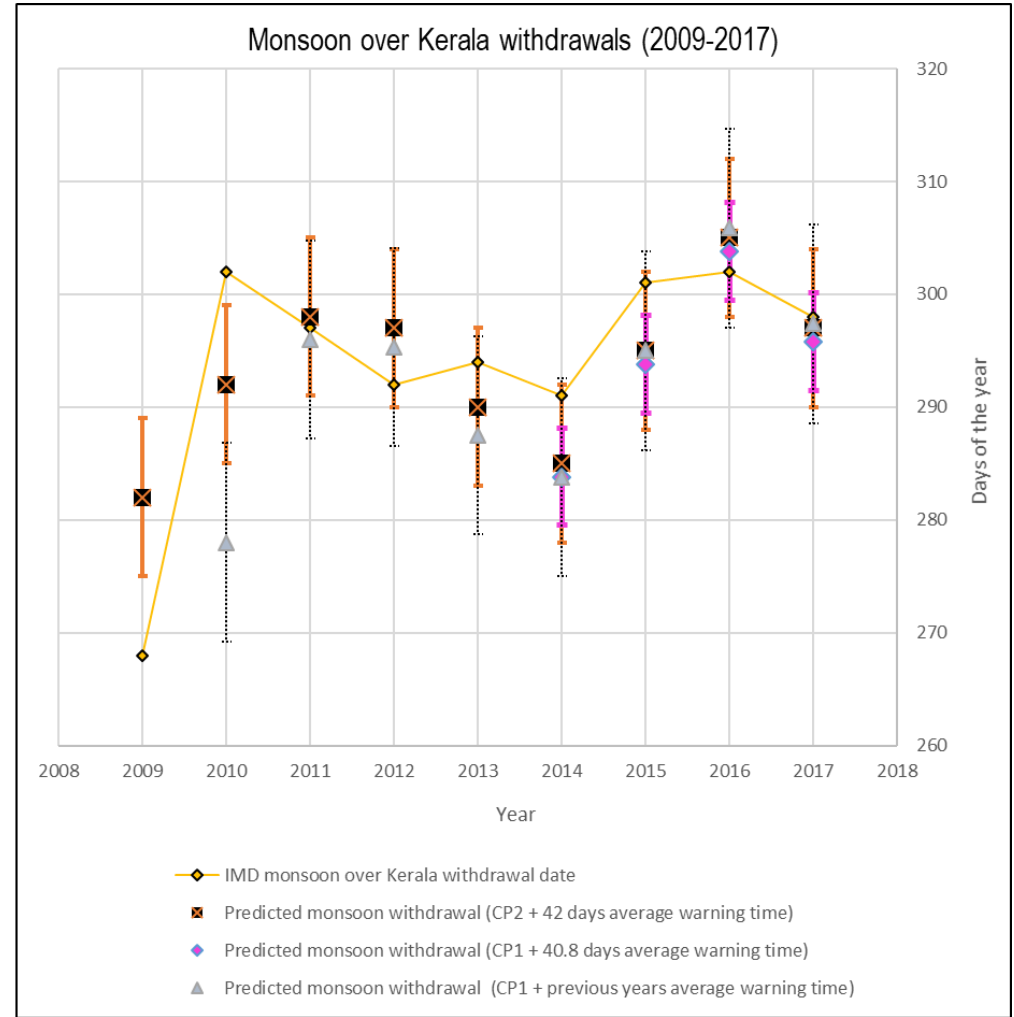

47  
 48 **Figure S3.** IMD monsoon onset dates (blue dots with straight line) and IMD monsoon withdrawal dates (orange diamonds with straight line) versus their respective predicted arrivals calculated using transequatorial  
 49 approach. Three predicted onset and withdrawal dates are plotted depending on how the averaged lead time is calculated: averaged lead time based on all available years (2009-2017) (crossed square), average lead time  
 50 based on split dataset (2009-2013) (diamonds), average lead time based on previous years, which is the prediction time that develops with each year (triangles). Cross points are obtained over normalized 0/15 days  
 51 averaged <sup>7</sup>Be activity concentration values. Kerala is the reference region for monsoon onset.

47  
 52  
 53  
 54  
 55



56 **Supplementary Formulas**

57

58 **Formula S1.** (1) Mean calculation and (2) normalized mean calculation used for trans equatorial approach. Where  $x^i$  is the  $^7\text{Be}$  activity concentration recorded each day [ $\mu\text{Bq}/\text{m}^3$ ].  $N$  is the number of days for which the  
59 mean is calculated: 0/-15 for the presented method.  $M$  is the calculated mean.  $\bar{x}$  is the overall averaged activity concentration of  $^7\text{Be}$  [ $\mu\text{Bq}/\text{m}^3$ ] measured at each location: 2003-2018 for Melbourne, Australia and 2009-  
60 2018 for Dubna, Russia.  $N(M)$  is the calculated normalized mean.

61

62 1 
$$M = \frac{1}{n} * \sum_{i=1}^n x^i$$

63

64 2 
$$N(M) = \frac{1}{\bar{x}} * \frac{1}{n} * \sum_{i=1}^n x^i$$
